# Supplementary material
Source: HighWire-hosted journal article supplement (http://www.qdcxjkg.com/highwire/filestream/113677/field_highwire_adjunct_files/0/ERJ-02010-2012_Disclosures.pdf)
Supplement: ERJ-02010-2012_Disclosures.pdf [file ERJ-02010-2012_Disclosures.pdf]

**Tobias Welte** is member of the advisory boards of Novartis, Bayer and Gilead; has received research grants from Novartis and Bayer; and has received fees for speaking from Novartis, Bayer and Gilead.
